# Supplementary material for: Injectable, pore-forming, self-healing, and adhesive hyaluronan hydrogels for soft tissue engineering applications
Source: Springer Nature journal article supplement (doi:10.1038/s41598-023-41468-9), 2023-08-31
Supplement: MOESM1 [file 41598_2023_41468_MOESM1_ESM.pdf]

## Supplementary information

### Injectable, pore-forming, self-healing, and adhesive hyaluronan hydrogels for soft tissue engineering applications

Sara Nejati, Luc Mongeau\*

Department of Mechanical Engineering, McGill University, Montreal, Canada

\* Corresponding author E-mail: [luc.mongeau@mcgill.ca](mailto:luc.mongeau@mcgill.ca)

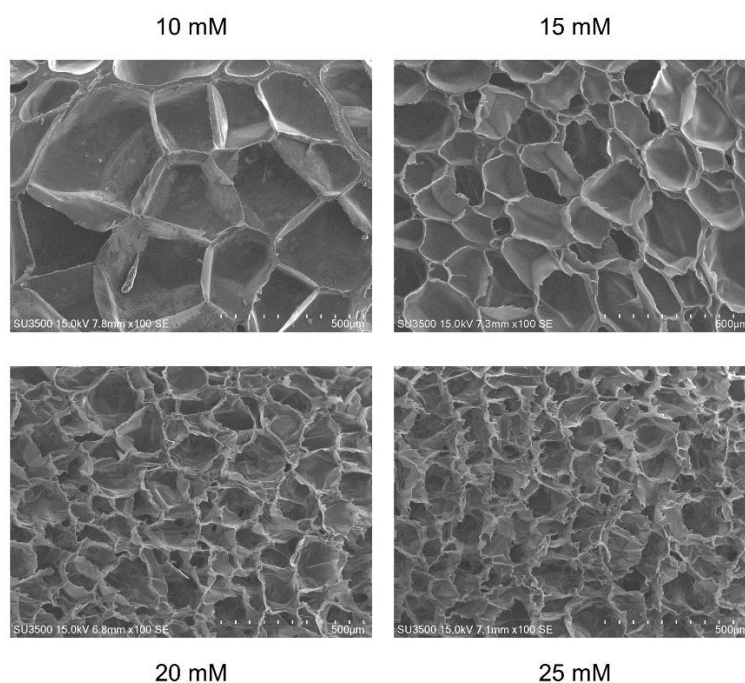

**Figure S1.** SEM images of DAHA hydrogels prepared using varying concentrations of  $\text{Fe}^{3+}$ .

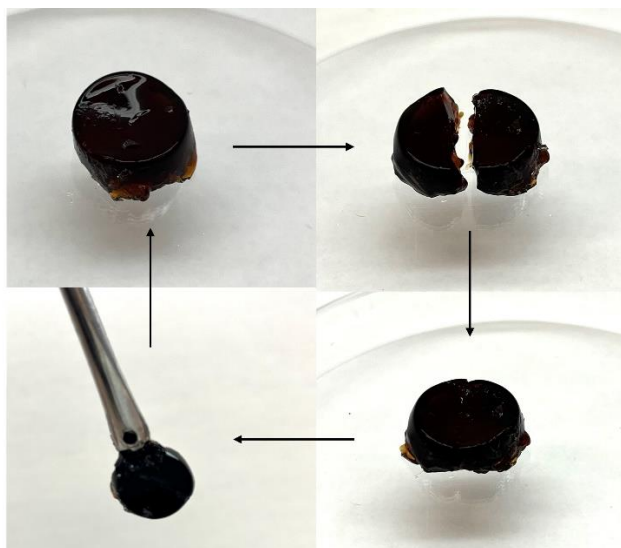

**Figure S2.** Photographs of the self-healing ability of DAHA/HAMA hydrogel.

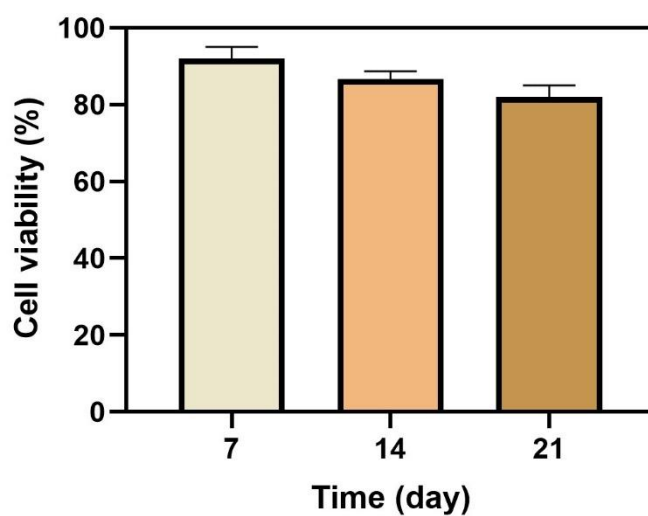

**Figure S3.** WST-1 assay showing the viability of hVFFs cultured with DAHA/HAMA degradation medium at predetermined time points.
